# Supplementary material
Source: PubMed Central journal article supplement (PMC4196613)
Supplement: 3dfdafa61142c92cff3a9376d5ce3305_genetics.114.169409-13.pdf [file 3dfdafa61142c92cff3a9376d5ce3305_genetics.114.169409-13.pdf]

**Table S6 GO terms for the 928 mRNAs enriched after 18 hours of U0126 treatment in *puf-8*; *lip-1* relative to 18 hours of vehicle DMSO control treatment in *puf-8*; *lip-1***

| Category           | Term                                          | Count | %    | FDR     |
|--------------------|-----------------------------------------------|-------|------|---------|
| Biological Process | GO:0007049~cell cycle                         | 65    | 7.1  | 2.2E-15 |
| Biological Process | GO:0022402~cell cycle process                 | 59    | 6.4  | 6.9E-14 |
| Biological Process | GO:0006259~DNA metabolic process              | 39    | 4.2  | 6.3E-13 |
| Biological Process | GO:0003006~reproductive developmental process | 110   | 12.0 | 9.1E-13 |
| Biological Process | GO:0007126~meiosis                            | 39    | 4.2  | 1.8E-12 |
| Biological Process | GO:0051327~M phase of meiotic cell cycle      | 39    | 4.2  | 2.3E-12 |
| Biological Process | GO:0051321~meiotic cell cycle                 | 39    | 4.2  | 7.7E-12 |
| Biological Process | GO:0022403~cell cycle phase                   | 48    | 5.2  | 2.6E-11 |
| Biological Process | GO:0007059~chromosome segregation             | 34    | 3.7  | 3.9E-10 |
| Biological Process | GO:0045132~meiotic chromosome segregation     | 30    | 3.3  | 1.1E-09 |
| Biological Process | GO:0007548~sex differentiation                | 95    | 10.3 | 2.7E-09 |
| Biological Process | GO:0048806~genitalia development              | 84    | 9.1  | 7.6E-08 |
| Biological Process | GO:0033554~cellular response to stress        | 25    | 2.7  | 1.0E-07 |
| Biological Process | GO:0006974~response to DNA damage stimulus    | 21    | 2.3  | 1.5E-07 |
| Biological Process | GO:0006281~DNA repair                         | 19    | 2.1  | 4.8E-07 |
| Biological Process | GO:0007276~gamete generation                  | 31    | 3.4  | 1.3E-06 |
| Biological Process | GO:0010564~regulation of cell cycle process   | 13    | 1.4  | 3.9E-06 |
| Biological Process | GO:0009410~response to xenobiotic stimulus    | 6     | 0.7  | 7.5E-06 |
| Biological Process | GO:0002009~morphogenesis of an epithelium     | 45    | 4.9  | 7.7E-06 |
| Biological Process | GO:0060429~epithelium development             | 45    | 4.9  | 1.1E-05 |
| Biological Process | GO:0051726~regulation of cell cycle           | 16    | 1.7  | 1.2E-05 |
| Biological Process | GO:0019953~sexual reproduction                | 34    | 3.7  | 1.6E-05 |
| Biological Process | GO:0048729~tissue morphogenesis               | 45    | 4.9  | 2.2E-05 |
| Biological Process | GO:0051445~regulation of meiotic cell cycle   | 9     | 1.0  | 3.6E-05 |
| Biological Process | GO:0040020~regulation of meiosis              | 8     | 0.9  | 3.9E-05 |
| Biological Process | GO:0007281~germ cell development              | 14    | 1.5  | 5.0E-05 |
| Biological Process | GO:0048477~oogenesis                          | 20    | 2.2  | 5.0E-05 |
| Biological Process | GO:0051276~chromosome organization            | 24    | 2.6  | 5.5E-05 |

|                    |                                                              |     |      |         |
|--------------------|--------------------------------------------------------------|-----|------|---------|
| Molecular Function | GO:0004518~nuclease activity                                 | 15  | 1.6  | 1.3E-04 |
| Biological Process | GO:0040008~regulation of growth                              | 169 | 18.4 | 1.4E-04 |
| Biological Process | GO:0043933~macromolecular complex subunit organization       | 21  | 2.3  | 1.4E-04 |
| Biological Process | GO:0040010~positive regulation of growth rate                | 151 | 16.4 | 1.5E-04 |
| Biological Process | GO:0007292~female gamete generation                          | 20  | 2.2  | 1.6E-04 |
| Biological Process | GO:0045927~positive regulation of growth                     | 163 | 17.7 | 2.3E-04 |
| Biological Process | GO:0032504~multicellular organism reproduction               | 51  | 5.5  | 3.1E-04 |
| Biological Process | GO:0065003~macromolecular complex assembly                   | 19  | 2.1  | 3.8E-04 |
| Biological Process | GO:0040007~growth                                            | 122 | 13.3 | 3.9E-04 |
| Biological Process | GO:0042006~masculinization of hermaphroditic germ-line       | 6   | 0.7  | 4.4E-04 |
| Biological Process | GO:0048580~regulation of post-embryonic development          | 23  | 2.5  | 4.7E-04 |
| Biological Process | GO:0010608~posttranscriptional regulation of gene expression | 12  | 1.3  | 6.3E-04 |
| Biological Process | GO:0006417~regulation of translation                         | 8   | 0.9  | 9.7E-04 |
| Biological Process | GO:0006325~chromatin organization                            | 16  | 1.7  | 1.1E-03 |
| Molecular Function | GO:0003684~damaged DNA binding                               | 5   | 0.5  | 1.5E-03 |
| Molecular Function | GO:0003702~RNA polymerase II transcription factor activity   | 9   | 1.0  | 1.5E-03 |
| Biological Process | GO:0009791~post-embryonic development                        | 148 | 16.1 | 1.9E-03 |
| Biological Process | GO:0048610~reproductive cellular process                     | 14  | 1.5  | 2.3E-03 |
| Biological Process | GO:0002164~larval development                                | 146 | 15.9 | 2.4E-03 |
| Biological Process | GO:0042127~regulation of cell proliferation                  | 8   | 0.9  | 2.5E-03 |
